# Supplementary material
Source: PubMed Central journal article supplement (PMC2781576)
Supplement: supp_M109.024208_jbc.M109.024208-1.pdf [file supp_M109.024208_jbc.M109.024208-1.pdf]

## Supplemental data

**Fig. S1**

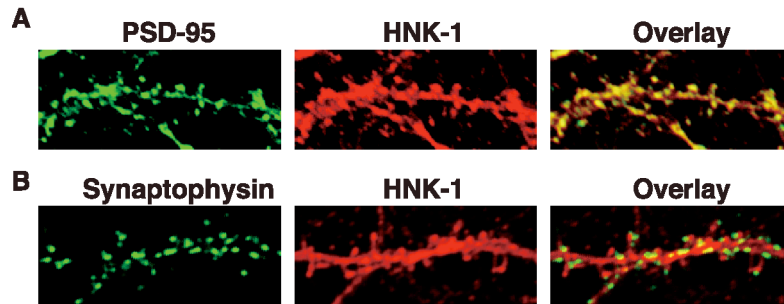

**Fig. S1. Subcellular localization of HNK-1 epitope on cultured hippocampal neurons.**

*A*, Cultured hippocampal neurons at 19 DIV were double immunostained with HNK-1 monoclonal antibody (red) and anti-PSD-95 antibody (green). *B*, Immunostaining with HNK-1 antibody (red) and anti-synaptophysin antibody (green). Note that HNK-1 glyco-epitope accumulates in a punctate structure that is co-localized with PSD-95 and apposed to synaptophysin.

Fig. S2

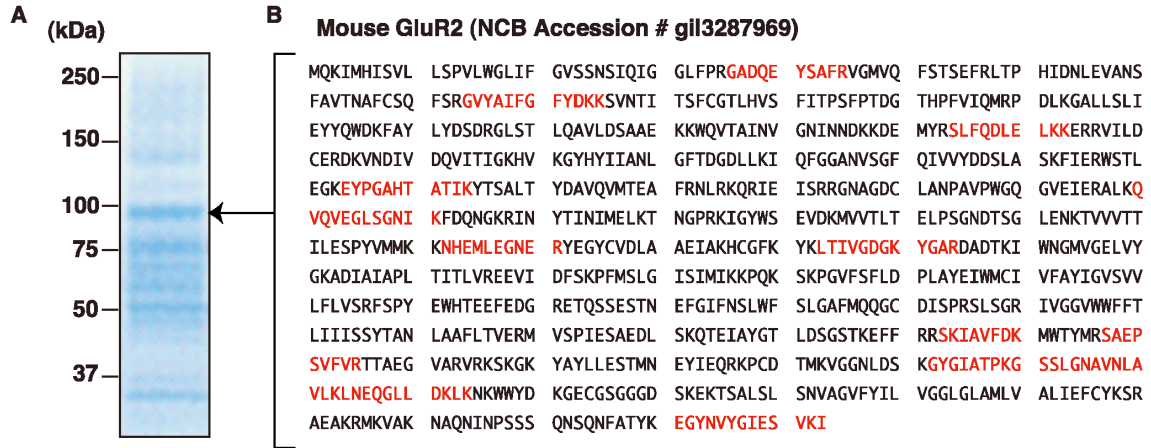

**Fig. S2. Purification and identification of a ~100 kDa HNK-1 carrier glycoprotein.** *A*, HNK-1 carrier glycoproteins from the P2 fraction of hippocampi were partially purified with HNK-1 antibody-conjugated beads. The purified proteins were isolated by SDS-PAGE and stained with Coomassie Brilliant Blue (Arrow indicates the purified ~100 kDa HNK-1 carrier glycoprotein band). The ~100 kDa protein band was digested with trypsin, and the peptide fragments were identified by LC/MS/MS. *B*, The result of a search against the mouse protein database of the National Center for Biotechnology Information depending on the acquired fragmentation spectra of peptides. The identified peptides are shown in red within the complete GluR2 sequence.
